# Supplementary material for: A pyrene-based electropolymerized film as a solid-state platform for multi-bit memory storage and fluorescence sensing of nitroaromatics in aqueous solutions
Source: Royal Society of Chemistry journal article supplement (doi:10.1039/c6tc00899b), 2016-01-01
Supplement: c6tc00899b1.pdf [file c6tc00899b1.pdf]

## Supporting Information

### **A pyrene-based electropolymerized film as a solid-state platform for multi-bit memory storage and fluorescent sensing of nitroaromatics in aqueous solutions**

*Megha Chhatwal, Anup Kumar, Rinkoo D. Gupta\*, Satish K. Awasthi\**

Megha Chhatwal, Anup Kumar, Prof. Satish. K. Awasthi  
Chemical Biology Laboratory, Department of Chemistry, University of Delhi,  
Delhi-110 007, India.

E-mail: [skawasthi@chemistry.du.ac.in](mailto:skawasthi@chemistry.du.ac.in)

Dr. Rinkoo D. Gupta  
Faculty of Life Sciences and Biotechnology, South Asian University,  
New Delhi-110 021, India

*Materials and methods:* The chemicals viz. 2-acetyl pyridine,  $(\text{NH}_4)_2\text{OsCl}_6$  and  $\text{NH}_4\text{PF}_6$  were purchased from Sigma Aldrich and used without further purification. 1-Pyrenecarboxaldehyde was bought from Alfa Aesar. Solvents (HPLC grade) were purchased from Merck and distilled using reported methods.<sup>S1</sup> Picric acid, 1-chloro 2,4-dinitrobenzene, nitrobenzene and all other quenchers like benzonitrile, benzoquinone, benzoic acid, toluene, benzene and aniline were purchased from s. d. fine and Rankem Chemicals Pvt. Ltd. Indium-tin-oxide coated glass was purchased from Scientific Technologies (India). Deuterated solvents ( $\text{CDCl}_3$  and  $\text{CD}_3\text{CN}$ ) were purchased from Sigma Aldrich and stored under freezer. The  $^1\text{H-NMR}$  spectrum was recorded at room temperature using Jeol JNMECX 400P spectrometer. All chemical shifts ( $\delta$ ) were recorded in ppm with reference to tetramethylsilane and coupling constant ( $J$ ) have been reported in Hz. Mass spectra were recorded on a mass spectrometer by Agilent Technology, USIC, University of Delhi, India.

Characterization of  $Os(\text{pyrtpy})_2\text{2PF}_6$ , **1**: 9.11 (s, 4H,  $\text{H}^{3',5',\text{tpy}}$ ), 8.74 (d,  $J = 9.2$  Hz, 2H,  $\text{H}^{2,\text{pyrene}}$ ), 8.61-8.56 (m, 6H,  $\text{H}^{3,3'',\text{tpy}} + \text{H}^{10,\text{pyrene}}$ ), 8.47 (d,  $J = 7.8$  Hz, 2H,  $\text{H}^{3,\text{pyrene}}$ ), 8.43-8.34 (m, 10H, pyrenyl protons), 8.2 (t,  $J = 7.6$  Hz, 2H,  $\text{H}^{7,\text{pyrene}}$ ), 7.82 (td,  $J = 7.8, 1.3$  Hz, 4H,  $\text{H}^{4,4'',\text{tpy}}$ ), 7.53 (d,  $J = 6.0$  Hz, 4H,  $\text{H}^{6,6'',\text{tpy}}$ ), 7.29 (td,  $J = 6.5, 1.2$  Hz, 4H,  $\text{H}^{5,5'',\text{tpy}}$ ); ESI-MS (calculated for  $\text{C}_{62}\text{H}_{38}\text{F}_{12}\text{N}_6\text{P}_2\text{Os}$ )  $m/z = 528.79$   $[\text{M}-2\text{PF}_6]^{2+}$ , 1056.34  $[\text{M}-2\text{PF}_6-\text{H}]^+$ , UV-vis ( $\sim 10^{-5}$  M,  $\text{CH}_3\text{CN}$ ):  $\lambda$  (nm) ( $\epsilon$ ,  $\text{M}^{-1} \text{cm}^{-1}$ ) = 238 (1,31,700), 275 (92,000), 313 (83,000), 491 (35,000), 667 (8,000); CV ( $\sim 10^{-4}$  M vs. Ag/AgCl, 0.1 M TBAP,  $\text{CH}_3\text{CN}$ ):  $E_{1/2}(\text{Os}^{2+/3+}) = 1.05$  V,  $E_{\text{oxd}}(\text{pyrene}) = \sim +1.48$  V.

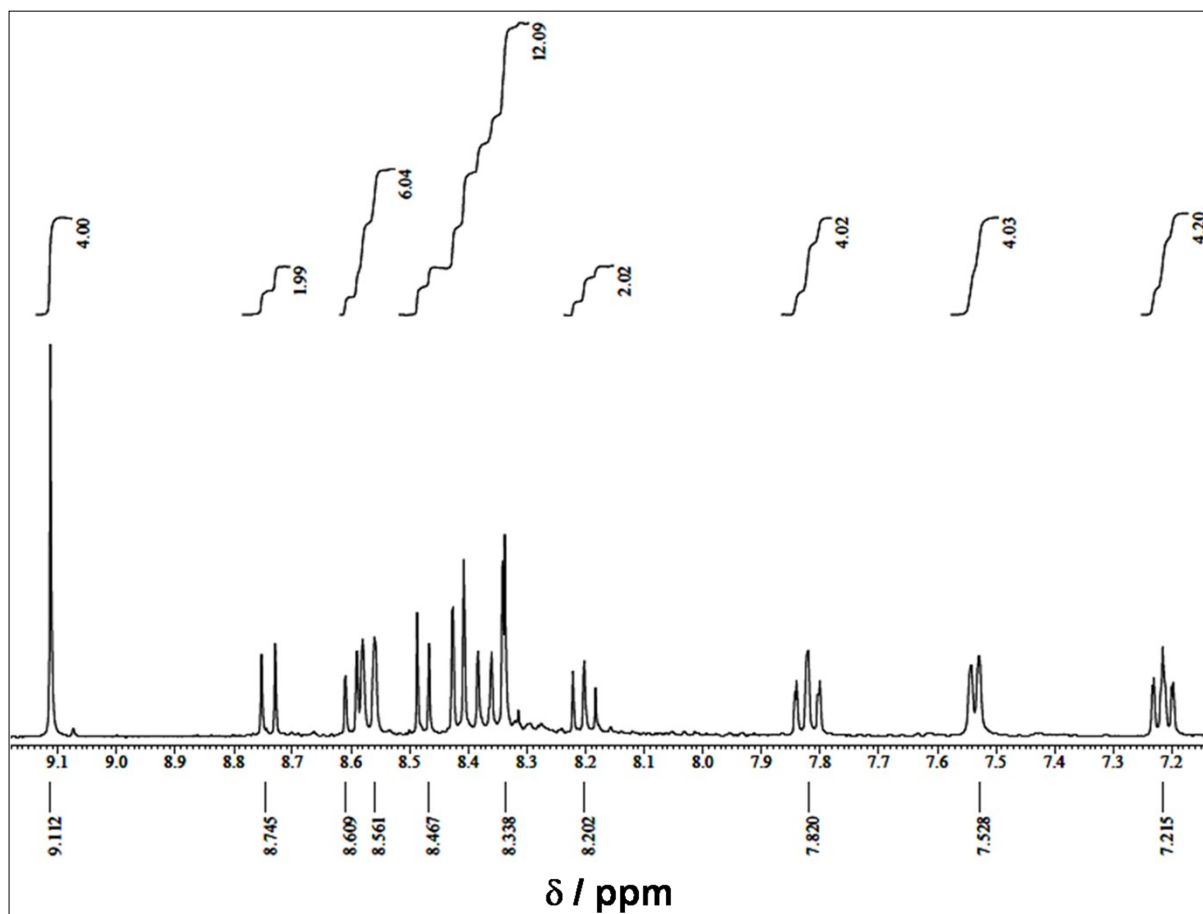

**Figure S1.**  $^1\text{H}$ -NMR spectrum of complex **1** in  $\text{CD}_3\text{CN}$

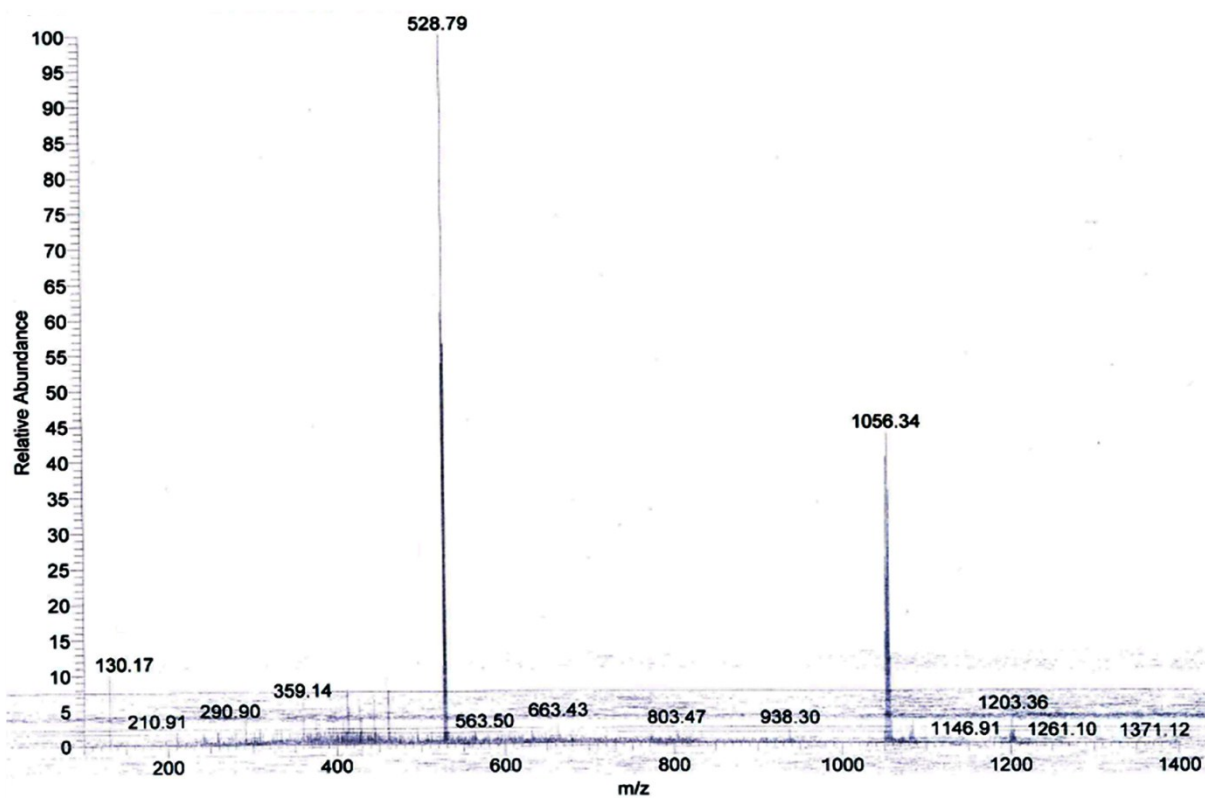

Figure S2. ESI-MS of complex 1

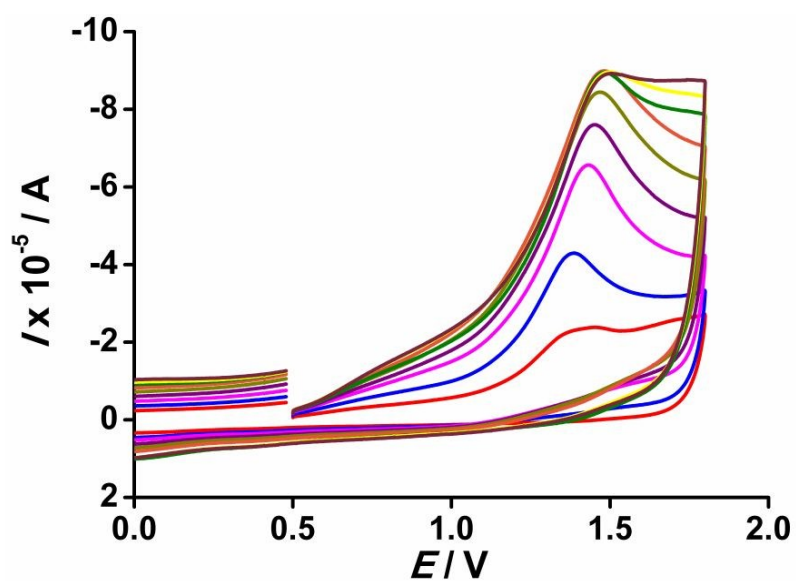

Figure S3. Cyclic voltammogram of pyrtpy ligand ( $\sim 10^{-3}$  M, vs. Ag/AgCl, 0.1 M  $Bu_4NPF_6$ ,  $CH_3CN$ ) at scan rates ranging from 0.1 to 1.0  $V s^{-1}$ .

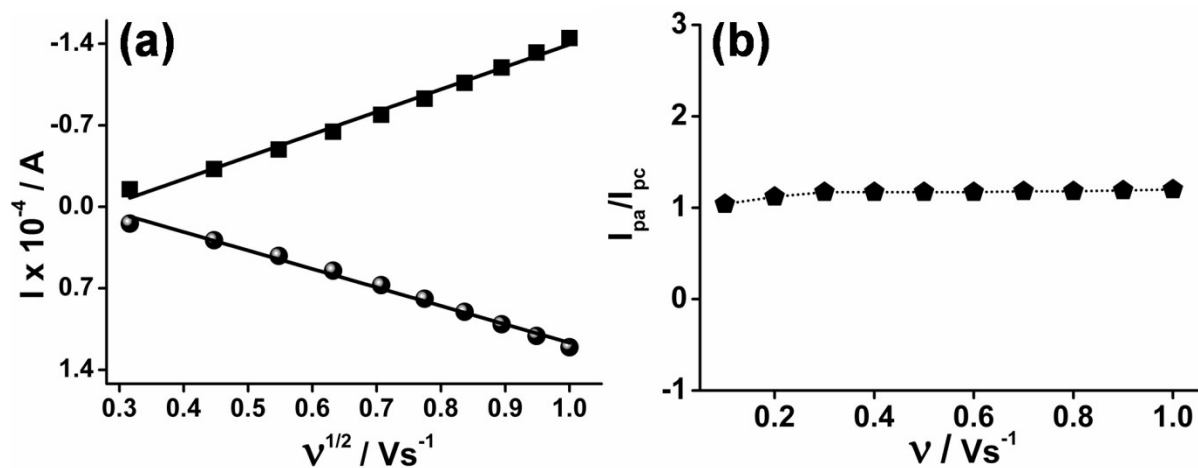

**Figure S4.** (a) Linear dependence of anodic (squares) and cathodic (spheres) peak currents of **complex 1** on scan rate ( $R^2 = 0.99$ ), (b) Plot of anodic and cathodic peak current ratio ( $I_{pa}/I_{pc}$ ) as a function of scan rate.

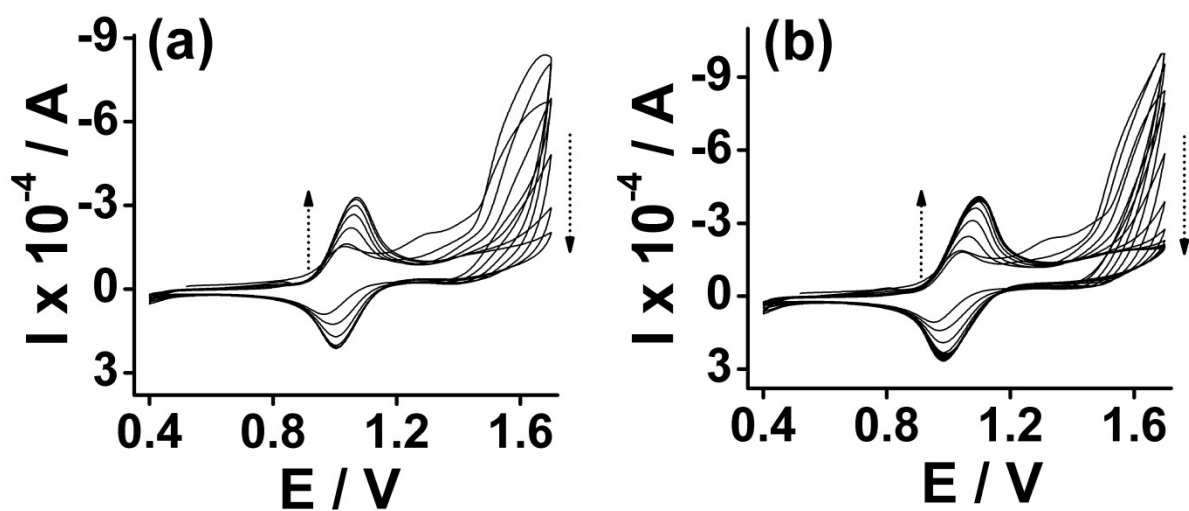

**Figure S5.** Oxidative electropolymerization of **1** ( $\sim 0.5 \times 10^{-3}$  M, vs. Ag/AgCl, 0.1 M  $\text{Bu}_4\text{NPF}_6$ ,  $\text{CH}_3\text{CN}$ ) on ITO electrode by (a) 5 and (b) 10 successive potential scans at  $50 \text{ mVs}^{-1}$ .

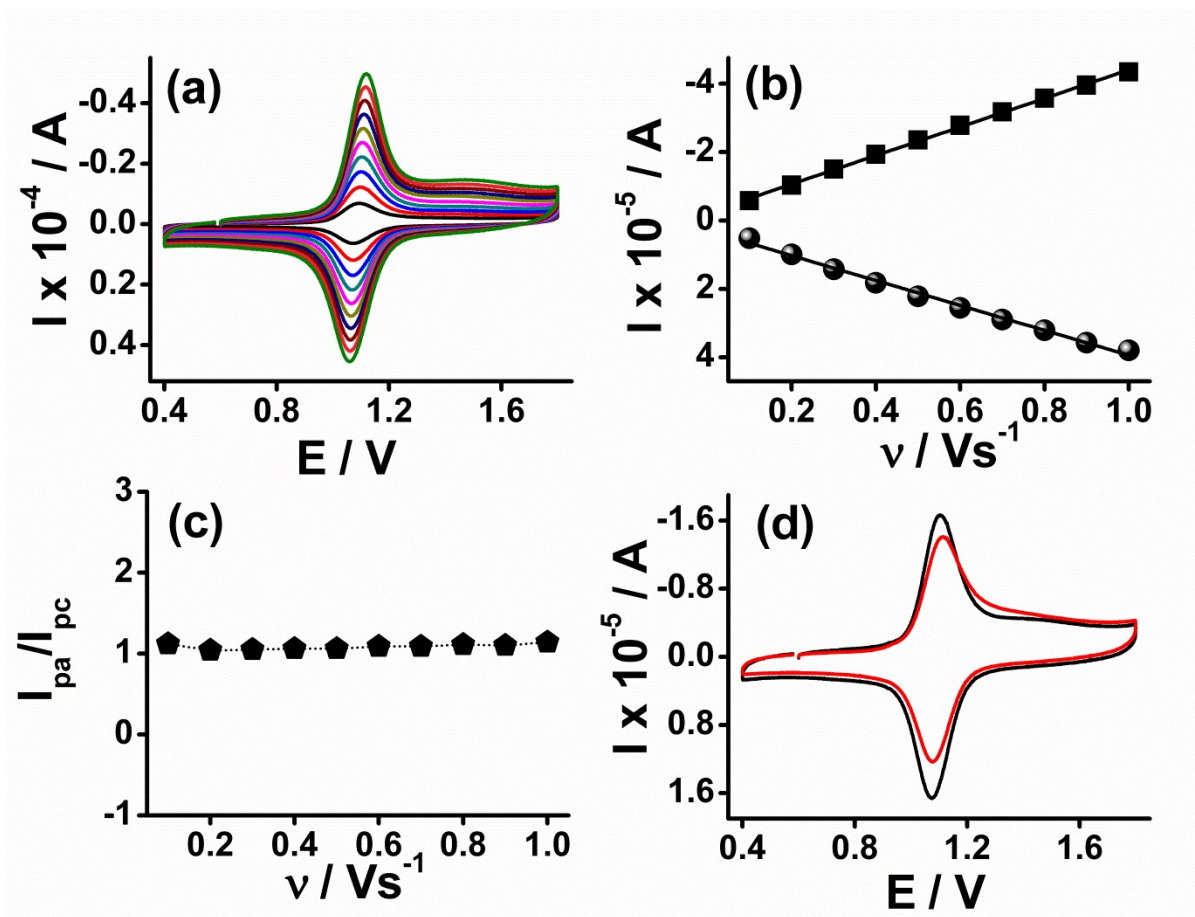

**Figure S6.** (a) Cyclic voltammetric profiles of **1-GCE** polymeric film (surface coverage =  $\sim 4.8 \times 10^{-10} \text{ mol cm}^{-2}$ ) at scan rates ranging from 0.1 to 1  $\text{Vs}^{-1}$ , (b) Linear dependence of anodic (squares) and cathodic (spheres) peak currents of the film on scan rate ( $R^2 = 0.99$ ), (c) Plot of anodic and cathodic peak current ratio ( $I_{pa}/I_{pc}$ ) as a function of scan rate, (d) Cyclic voltammetric profiles of the film before (black line) and after (red line)  $3 \times 10^2$  cycles of potential stress at the scan rate 0.3  $\text{Vs}^{-1}$ .

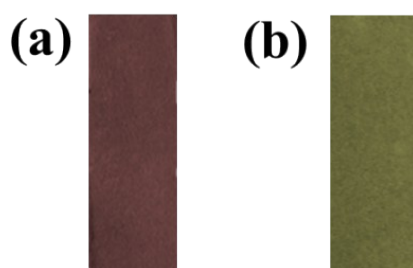

**Figure S7.** Visual colour change of **1-ITO** polymeric film a) before and b) after oxidation by applying potential of +1.25 V.

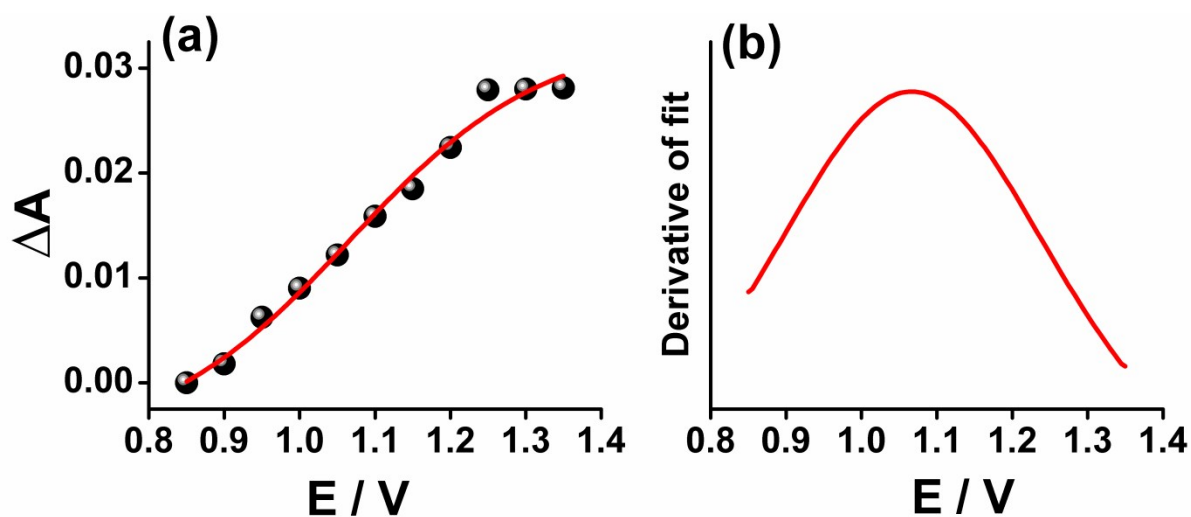

**Figure S8.** (a) Optical response of **1-ITO** film at the <sup>1</sup>MLCT band ( $\lambda = 500$  nm) as a function of voltage upon applying double-potential steps between +0.85 V and (0.85 V + n0.05 V); n = 1, 2.....10 with 20 s interval. Each data point represents the average of 10 double-potential cycles. The red line depicts the sigmoidal fit of the data ( $R^2 = 0.98$ ) with an inflection point at 1.06 V, (b) Derivative of the sigmoidal fit with full-width at half-maximum (FWHM) value of 0.40 V.

---

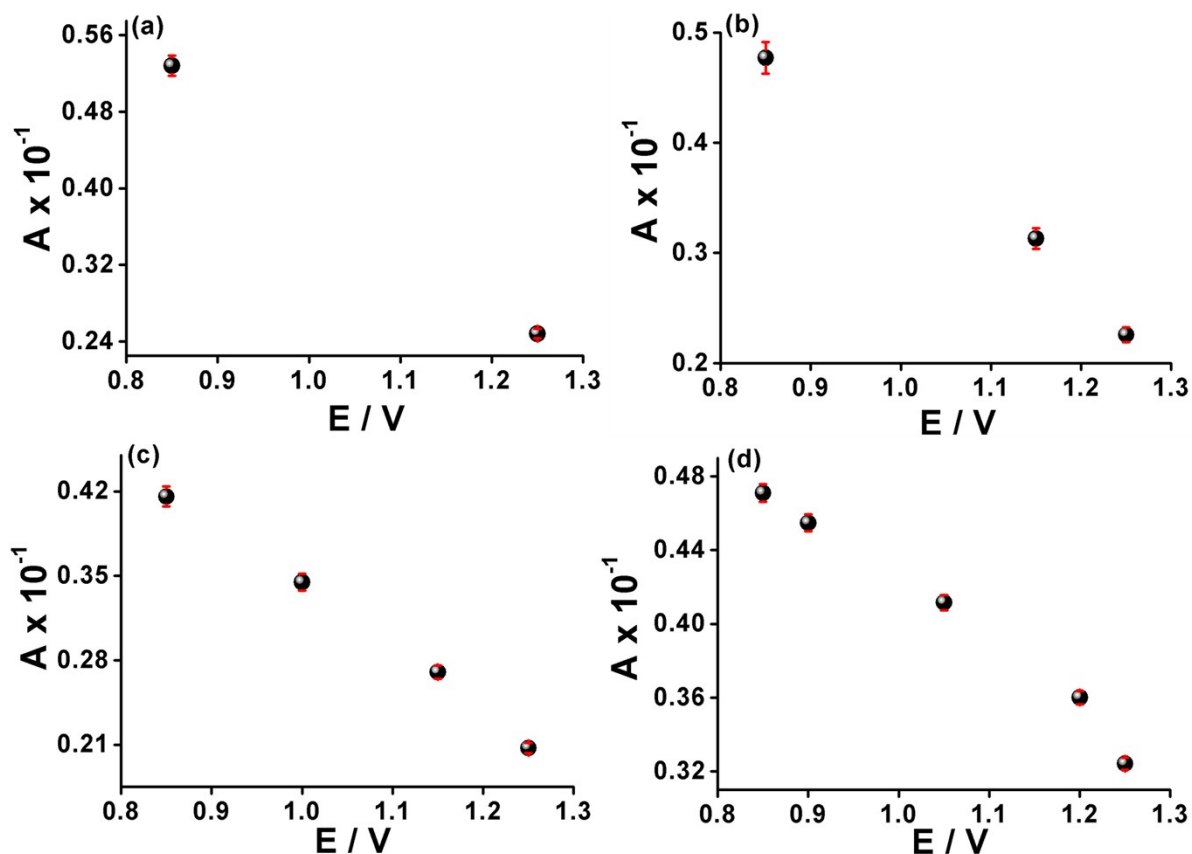

**Figure S9.** (a) Double-potential step, (b) Triple-potential step, (c) Quadruple-potential step and (d) Quintuple potential step switching of 1-ITO polymeric film at <sup>1</sup>MLCT band using same set-up for three experiments.

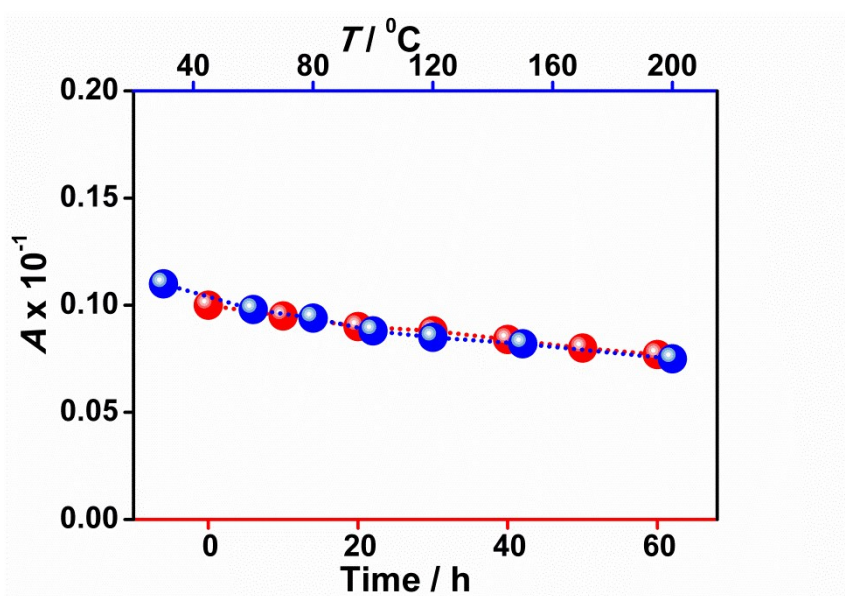

**Figure S10.** UV-vis monitoring of thermal (blue spheres, for ~ 1 h) and temporal (red spheres, at 200°C) stability of 1-ITO polymeric film.

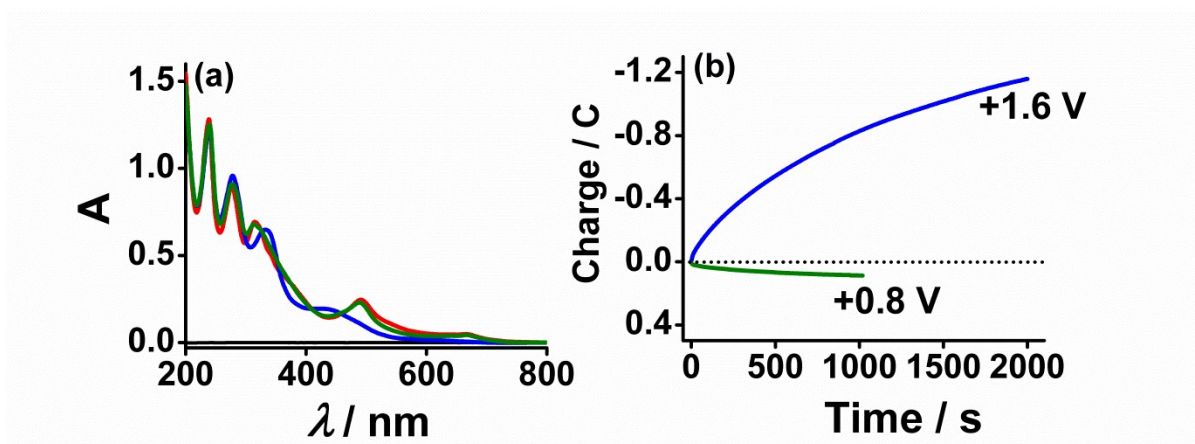

**Figure S11.** (a) Absorbance changes in **complex 1** ( $\sim 0.7 \times 10^{-5}$  M, vs. Ag/AgCl, 20 mM  $\text{Bu}_4\text{NPF}_6$ ,  $\text{CH}_3\text{CN}$ , red solid line) upon applying voltage input for oxidation at +1.6 V (blue solid line) and reduction at +0.8 V (green solid line), (b) Plot of charge vs. time, for oxidation (blue trace) and reduction (green trace) of osmium centers at suitable potential.

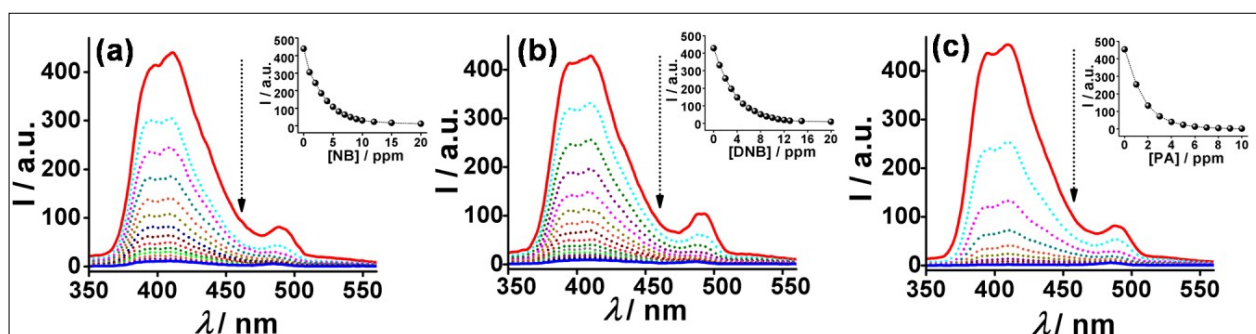

**Figure S12:** Emission intensity changes in **complex 1** ( $10^{-5}$  M,  $\text{CH}_3\text{CN}$ ) upon addition of (a) 0-20 ppm of NB, (b) 0-20 ppm of DNB and (c) 0-10 ppm of PA in  $\text{CH}_3\text{CN}$ . The excitation wavelength was fixed at  $\lambda = 238$  nm. The dotted arrows serve guide to the eyes. Insets: Plots of emission intensity at  $\lambda = 410$  nm as a function of ppm concentration of NACs.



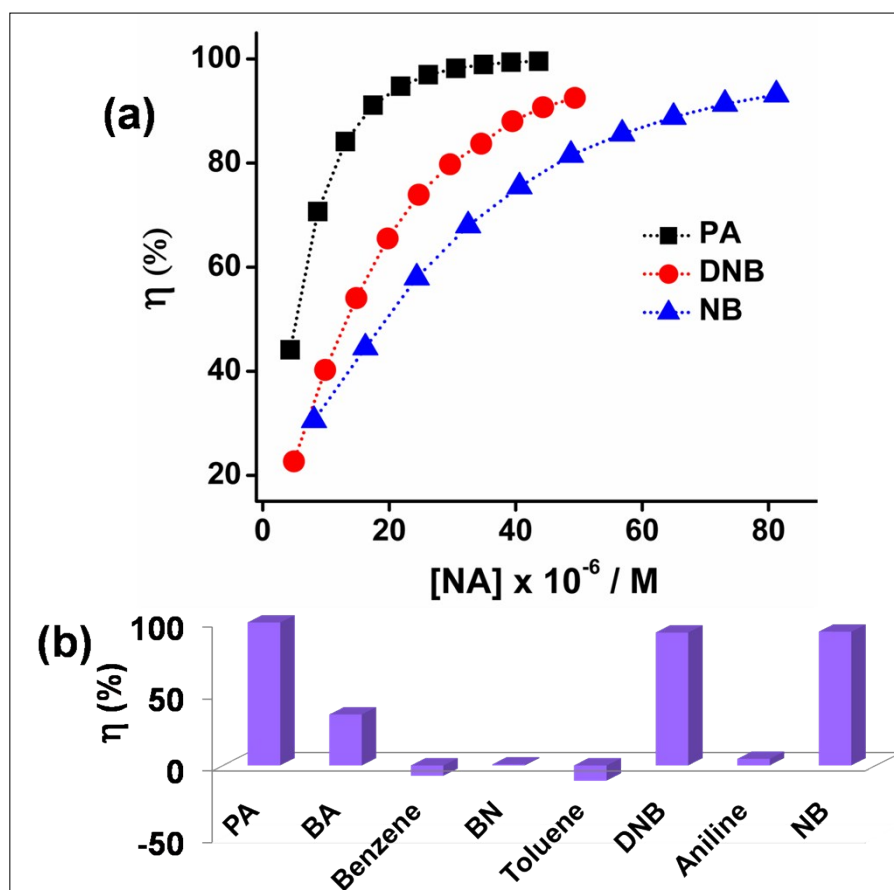

**Figure S13:** (a) Quenching efficiency ( $\eta\%$ ) of **complex 1** ( $10^{-5}$  M,  $\text{CH}_3\text{CN}$ ) for different NACs at  $\lambda = 410$  nm, (b) Representative bar chart showing selective sensing by **complex 1** ( $10^{-5}$  M,  $\text{CH}_3\text{CN}$ ) at  $\lambda = 410$  nm upon addition of various competitive quenchers (20 ppm,  $\text{CH}_3\text{CN}$ ). PA: picric acid, BA: benzoic acid, BN: benzonitrile, DNB: 1-chloro 2,4-dinitrobenzene and NB: nitrobenzene.

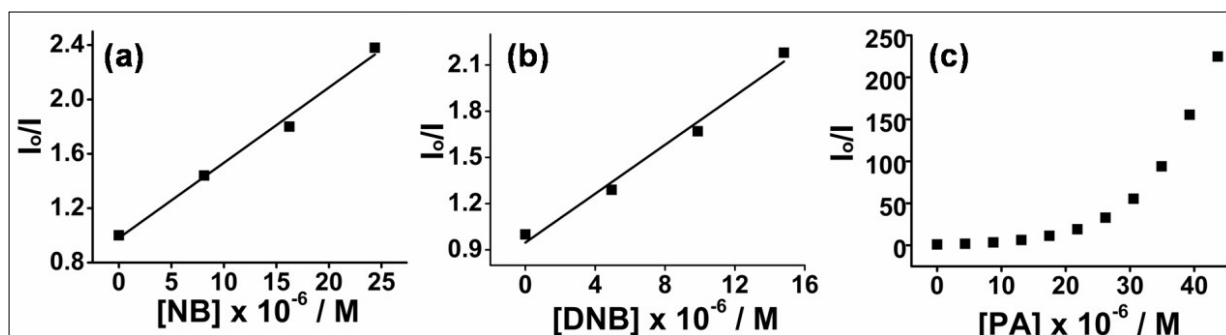

**Figure S14:** Stern-Volmer plots for the fluorescence quenching of **complex 1** ( $10^{-5}$  M,  $\text{CH}_3\text{CN}$ ) at  $\lambda = 410$  nm by (a) NB, (b) DNB and (c) PA. The linear fit has the  $R^2$  value of 0.97-0.98.

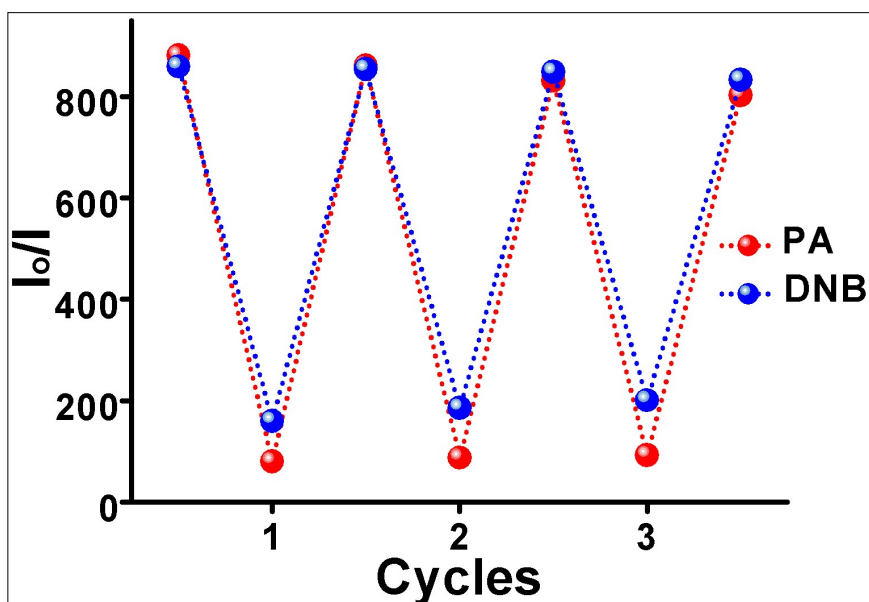

**Figure S15:** The sensing-recovery cycles for **1-ITO** film upon addition of PA (50 ppm, red spheres) and DNB (15 ppm, blue spheres) and subsequent regeneration of emission in water. Dotted lines serve guide to eyes.

References:

S1: D. D. Perrin and W. L. F. Armarego, *Purification of Laboratory Chemicals*, 3. Aufl., Oxford. Pergamon Press, **1988**.

S2: X.-G. Li, Y.-W. Liu, M.-R. Huang, S. Peng, L.-Z. Gong, M. G. Moloney, *Chem. Eur. J.* **2010**, *16*, 4803.
